# Supplementary material for: Dual-Color Fluorescent Hydrogel Microspheres Combined with Smartphones for Visual Detection of Lactate
Source: MDPI journal article supplement (doi:10.3390/bios12100802), 2022-09-28
Supplement: s1 [file s1]

*Supplementary Material*

# Dual-Color Fluorescent Hydrogel Microspheres Combined with Smartphones for Visual Detection of Lactate

Sisi Yang <sup>1</sup>, Ziwen Tang <sup>1</sup>, Yilong Tian <sup>1</sup>, Xinghu Ji <sup>1</sup>, Fubing Wang <sup>2</sup>, Conghua Xie <sup>2,3</sup> and Zhike He <sup>1,2,3,\*</sup>

<sup>1</sup> College of Chemistry and Molecular Sciences, Wuhan University, Wuhan 430072, China

<sup>2</sup> Wuhan Research Center for Infectious Diseases and Cancer, Chinese Academy of Medical Sciences, Wuhan 430072, China

<sup>3</sup> Department of Radiation and Medical Oncology, Hubei Key Laboratory of Tumor Biological Behaviors, and Hubei Cancer Clinical Study Center, Zhongnan Hospital of Wuhan University, Wuhan 430072, China

\* Correspondence: zhkhe@whu.edu.cn; Tel.: +86-27-68756557; Fax: +86-27-68754067

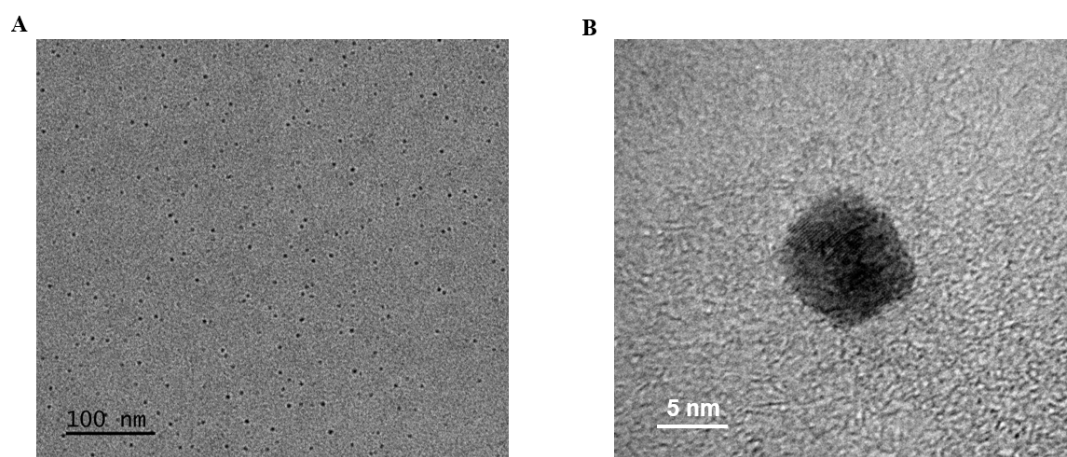

**Figure S1.** Characterization of CdTe QDs. (A) TEM imaging of CdTe QDs. Scale bar: 100 nm. (B) TEM imaging of CdTe QDs. Scale bar: 5 nm.

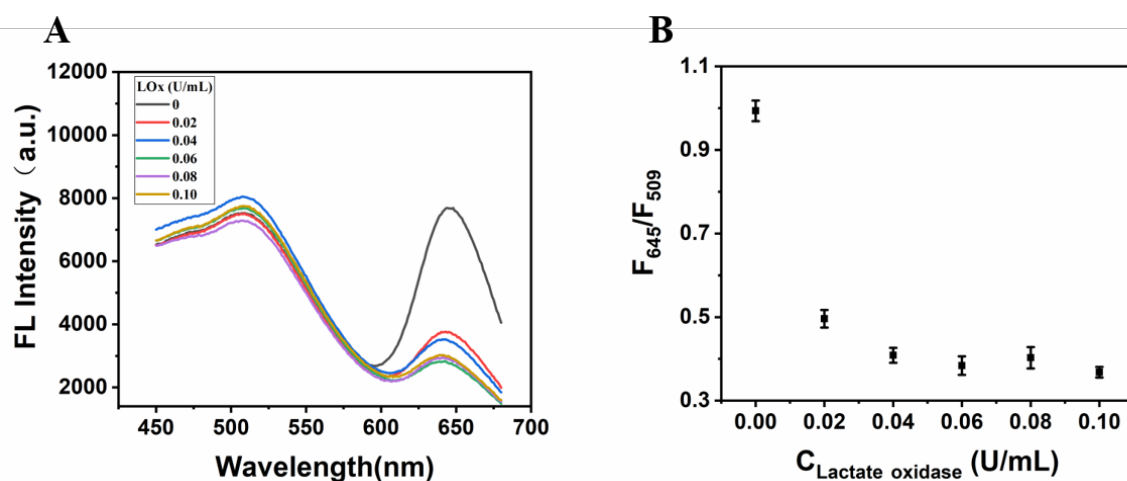

**Figure S2.** Optimization of LOx dosage when PDCN was used as a reference. (A) Fluorescence emission spectra of the mixed solution of PDCN, CdTe QDs and lactate upon the addition of various concentrations of LOx (0-0.10 U/mL). (B) The effect of concentration of LOx on fluorescence intensity ratio of CdTe QDs to PDCN. Excitation wavelength: 365 nm.

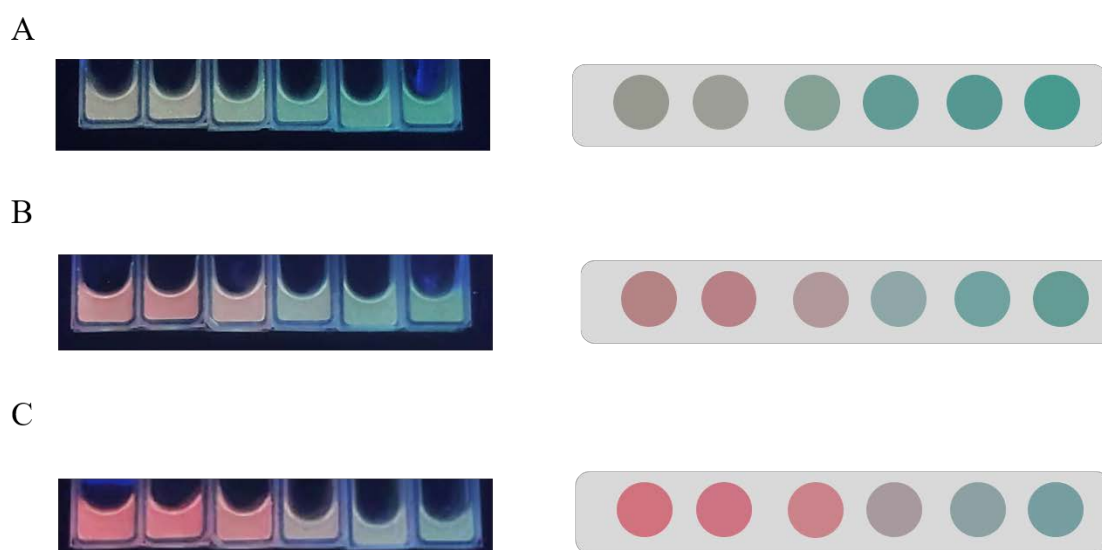

**Figure S3.** The effect of PDCN/CdTe QDs volume ratio (A: 3:2, B: 3:3, C: 3:4) on fluorescence color of mixed solution when reacting with different concentrations of  $\text{H}_2\text{O}_2$  (from left to right: 0, 0.01, 0.1, 0.5, 1.0, 1.5 mM).

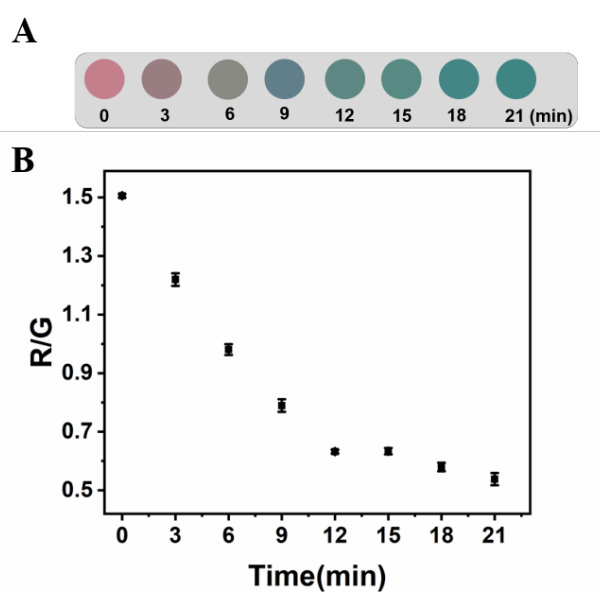

**Figure S4.** Optimization of the reaction time between Alg@PDCN@QDs-LOx MSs and lactate. (A) The effect of reaction time between Alg@PDCN@QDs-LOx MSs and lactate on the fluorescence color of Alg@PDCN@QDs-LOx MSs. (B) The effect of reaction time between Alg@PDCN@QDs-LOx MSs and lactate on R/G values. Lactate: 1mM, pH: 8.2.

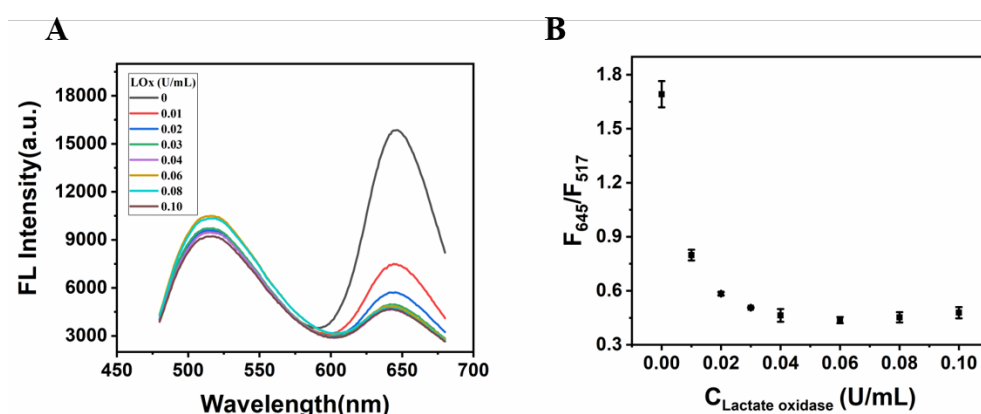

**Figure S5.** Optimization of LOx dosage when MFM was used as a reference. (A) Fluorescence emission spectra of the mixed solution of MFM, CdTe QDs and lactate upon the addition of various concentrations of LOx (0-0.10 U/mL). (B) The effect of concentration of LOx on fluorescence intensity ratio of CdTe QDs to MFM. Excitation wavelength: 365 nm.

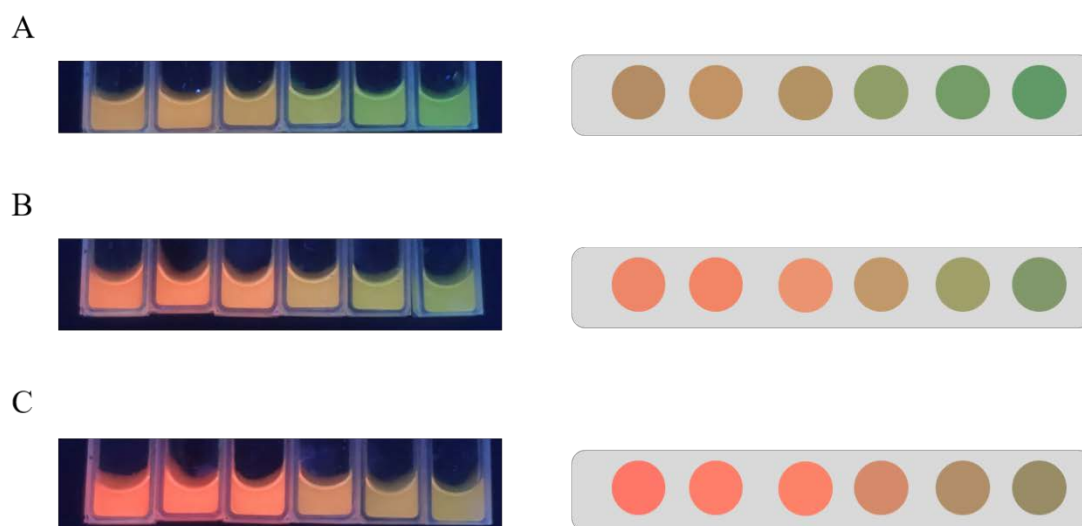

**Figure S6.** The effect of MFM/CdTe QDs volume ratio (A: 1:1, B: 1:2, C: 1:3) on fluorescence color of mixed solution when reacting with different concentrations of H<sub>2</sub>O<sub>2</sub> (from left to right: 0, 0.01, 0.1, 0.5, 1.0, 1.5 mM).

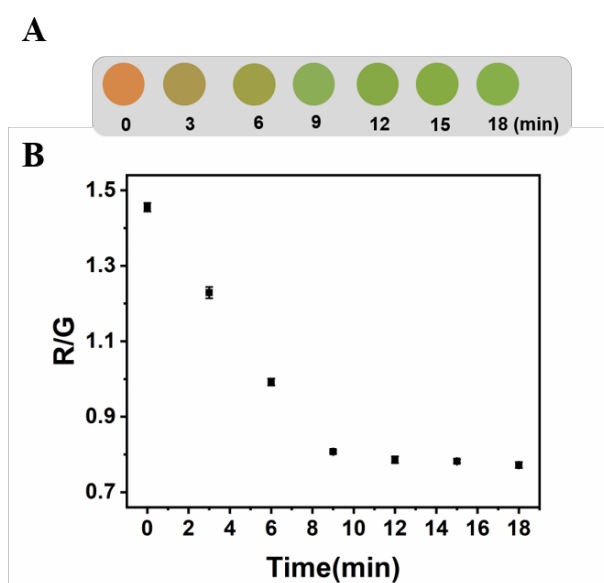

**Figure S7.** Optimization of the reaction time between Alg@MFM@QDs-LOx MSs and lactate. (A) The effect of reaction time between Alg@MFM@QDs-LOx MSs and lactate on the fluorescence color of Alg@MFM@QDs-LOx MSs. (B) The effect of reaction time between Alg@MFM@QDs-LOx MSs and lactate on R/G values. Lactate: 1mM, pH: 8.2.

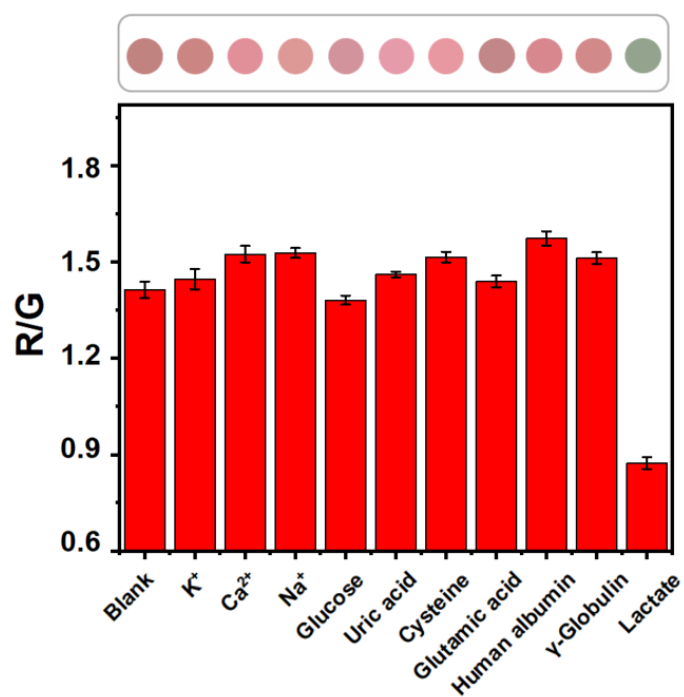

**Figure S8.** The effect of different ions (10 mM), small molecules (10 mM), protein (1  $\mu$ g/mL) and lactic acid (1 mM) on R/G value of Alg@PDCN@QDs-LOx MSs.

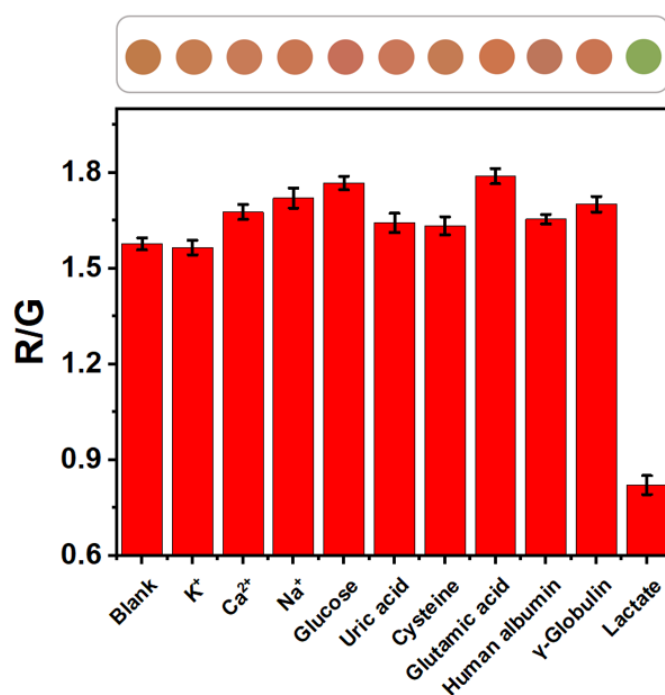

**Figure S9.** The effect of different ions (10 mM), small molecules (10 mM), protein (1  $\mu\text{g/mL}$ ) and lactic acid (1 mM) on R/G value of Alg@MFM@QDs-LOx MSs.

**Table S1.** Comparison this developed method with the reported methods for lactate detection.

| Biosensing materials                       | Analytical method        | Linear range ( $\mu\text{M}$ ) | LOD ( $\mu\text{M}$ ) | Reference |
|--------------------------------------------|--------------------------|--------------------------------|-----------------------|-----------|
| —                                          | LC-MS/MS                 | 0.5–100                        | 0.5                   | [1]       |
| GC/MoS <sub>2</sub> /LOx                   | Electrochemistry         | 56–770                         | 17                    | [2]       |
| PB/LOx/chitosan coated gold fiber          | Electrochemistry         | 0–3 $\times$ 10 <sup>4</sup>   | 137                   | [3]       |
| PB NPs/g-C <sub>3</sub> N <sub>4</sub> NSs | Colorimetry              | 5–100                          | 2.2                   | [4]       |
| LOX-PS@PtP*Si@C6 membrane                  | Ratiometric fluorescence | 100–800                        | 60                    | [5]       |
| Alg@MFM@QDs-LOx MSs                        | Ratiometric fluorescence | 10–1500                        | 1.22                  | This work |

**Table S2.** Comparison of the detection results of lactate from Alg@MFM@QDs-LOx MSs with clinical results from the Zhongnan Hospital of Wuhan University.

| Serum samples | This method | Clinical results | Matching results | Serum samples | This method | Clinical results | Matching results |
|---------------|-------------|------------------|------------------|---------------|-------------|------------------|------------------|
| 1             | *           | *                | P                | 16            | +           | +                | P                |
| 2             | *           | *                | P                | 17            | +           | +                | P                |
| 3             | +           | *                | N                | 18            | *           | *                | P                |
| 4             | *           | *                | P                | 19            | +           | +                | P                |
| 5             | +           | +                | P                | 20            | *           | *                | P                |
| 6             | *           | *                | P                | 21            | +           | +                | P                |
| 7             | +           | +                | P                | 22            | +           | +                | P                |
| 8             | *           | *                | P                | 23            | +           | +                | P                |
| 9             | *           | *                | P                | 24            | *           | *                | P                |
| 10            | *           | *                | P                | 25            | *           | *                | P                |
| 11            | +           | +                | P                | 26            | *           | *                | P                |
| 12            | +           | +                | P                | 27            | +           | *                | N                |
| 13            | *           | *                | P                | 28            | *           | *                | P                |
| 14            | *           | *                | P                | 29            | *           | *                | P                |
| 15            | +           | +                | P                |               |             |                  |                  |

"\*" indicates the lactate concentration is in the normal range; "+" indicates the lactate concentration is above the threshold; "P" indicates the result of this method is consistent with clinical result from the Zhongnan Hospital of Wuhan University; "N" indicates the result of this method is not consistent with clinical result from the Zhongnan Hospital of Wuhan University.

## References

1. Jackson, T.C.; Zhang, Y.V.; Sime P.J.; Phipps, R.P.; Kottmann, R.M. Development of an accurate and sensitive method for lactate analysis in exhaled breath condensate by LC MS/MS. *J. Chromatogr. B* **2017**, *1061*, 468–473.
2. Parra-Alfambra, A.M.; Casero, E.; Vázquez, L.; Quintana, C.; del Pozo, M.; Petit-Domínguez, M.D. MoS<sub>2</sub> nanosheets for improving analytical performance of lactate biosensors. *Sens. Actuators B:Chem.* **2018**, *274*, 310–317.
3. Wang, R.; Zhai, Q.; An, T.; Gong, S.; Cheng, W. Stretchable gold fiber-based wearable textile electrochemical biosensor for lactate monitoring in sweat. *Talanta* **2021**, *222*, 121484.
4. Zhou, D.; Wang, C.; Luo, J.; Yang, M. C<sub>3</sub>N<sub>4</sub> nanosheet-supported prussian blue nanoparticles as a peroxidase mimic: Colorimetric enzymatic determination of lactate. *Microchim. Acta* **2019**, *186*, 735.
5. Duong, H.D.; Rhee, J.I. Ratiometric fluorescent biosensors for glucose and lactate using an oxygen-sensing membrane. *Biosensors* **2021**, *11*, 208.
